# Supplementary material for: Selection for production-related traits in Pelargonium zonale: improved design and analysis make all the difference
Source: PubMed Central journal article supplement (PMC5321157; doi:10.1038/hortres.2017.4), 2017-02-22
Supplement: hortres20174-s3.pdf [file hortres20174-s3.pdf]

Variance components of repeated measurement analysis including serial correlation of observations

| <b>Table 1: Variance components obtained for repeated measurement analysis of stem cutting count (SCC) in TPE I by considering an unstructured variance-covariance structure for serial correlations of observations of T.REP.IB and T.REP.COL; T time effect, T.REP replicate effect, GEN genotype effect, T.GEN genotype time interaction, T.REP.IB row effect, T.REP.COL column effect, T.REP.IB.PAIR residual error</b> |                                                |                           |                 |
|-----------------------------------------------------------------------------------------------------------------------------------------------------------------------------------------------------------------------------------------------------------------------------------------------------------------------------------------------------------------------------------------------------------------------------|------------------------------------------------|---------------------------|-----------------|
| <b>Effect</b>                                                                                                                                                                                                                                                                                                                                                                                                               | <b><i>l</i>, the time-point of observation</b> | <b>Variance parameter</b> | <b>Estimate</b> |
| <b>T</b>                                                                                                                                                                                                                                                                                                                                                                                                                    |                                                |                           | 2.0746          |
| <b>T.REP</b>                                                                                                                                                                                                                                                                                                                                                                                                                |                                                |                           | 0.1864          |
| <b>GEN</b>                                                                                                                                                                                                                                                                                                                                                                                                                  |                                                |                           | 2.4271          |
| <b>T.GEN</b>                                                                                                                                                                                                                                                                                                                                                                                                                |                                                |                           | 0.6684          |
| <b>T.REP.IB</b>                                                                                                                                                                                                                                                                                                                                                                                                             | <b>1</b>                                       | <b>VAR 1</b>              | 0               |
|                                                                                                                                                                                                                                                                                                                                                                                                                             | <b>2</b>                                       | <b>VAR 2</b>              | 0.0034          |
|                                                                                                                                                                                                                                                                                                                                                                                                                             | <b>3</b>                                       | <b>VAR 3</b>              | 0.0001          |
|                                                                                                                                                                                                                                                                                                                                                                                                                             |                                                | <b>COV 2 - 1</b>          | 0.0001          |
|                                                                                                                                                                                                                                                                                                                                                                                                                             |                                                | <b>COV 3 - 1</b>          | 0               |
|                                                                                                                                                                                                                                                                                                                                                                                                                             |                                                | <b>COV 3 - 2</b>          | 0.0004          |
| <b>T.REP.COL</b>                                                                                                                                                                                                                                                                                                                                                                                                            | <b>1</b>                                       | <b>VAR 1</b>              | 0.3638          |
|                                                                                                                                                                                                                                                                                                                                                                                                                             | <b>2</b>                                       | <b>VAR 2</b>              | 0.0834          |
|                                                                                                                                                                                                                                                                                                                                                                                                                             | <b>3</b>                                       | <b>VAR 3</b>              | 0.0076          |
|                                                                                                                                                                                                                                                                                                                                                                                                                             |                                                | <b>COV 2 - 1</b>          | 0.0948          |
|                                                                                                                                                                                                                                                                                                                                                                                                                             |                                                | <b>COV 3 - 1</b>          | 0.0044          |
|                                                                                                                                                                                                                                                                                                                                                                                                                             |                                                | <b>COV 3 - 2</b>          | 0.0222          |
| <b>T.REP.IB.PAIR</b>                                                                                                                                                                                                                                                                                                                                                                                                        | <b>1</b>                                       | <b>VAR 1</b>              | 7.2480          |
|                                                                                                                                                                                                                                                                                                                                                                                                                             | <b>2</b>                                       | <b>VAR 2</b>              | 10.8184         |
|                                                                                                                                                                                                                                                                                                                                                                                                                             | <b>3</b>                                       | <b>VAR 3</b>              | 2.6309          |
|                                                                                                                                                                                                                                                                                                                                                                                                                             |                                                | <b>COV 2 - 1</b>          | 2.4872          |
|                                                                                                                                                                                                                                                                                                                                                                                                                             |                                                | <b>COV 3 - 1</b>          | 0.3703          |
|                                                                                                                                                                                                                                                                                                                                                                                                                             |                                                | <b>COV 3 - 2</b>          | 0.4035          |

**Table 2: Variance components obtained for repeated measurement analysis of rooted stem cutting counts assigned to (S4 + S5) of root formation (RF) in TPE I by considering a compound symmetry variance-covariance structure for serial correlations of observations of observations for T.REP.IB and T.REP.COL; T time effect, T.REP replicate effect, GEN genotype effect, T.GEN genotype time interaction, T.REP.IB row effect, T.REP.COL column effect, RTABLE rooting table effect, RTABLE.TRAY tray effect, T.REP.IB.PAIR residual error**

| Effect        | Variance parameter | Estimate |
|---------------|--------------------|----------|
| T             |                    | 0.4980   |
| T.REP         |                    | 0.9921   |
| GEN           |                    | 1.7444   |
| T.GEN         |                    | 0.7786   |
| T.REP.IB      | VAR                | 0.0341   |
|               | COV                | 0        |
| T.REP.COL     | VAR                | 0.1657   |
|               | COV                | 0.0254   |
| T.REP.IB.COL  | VAR                | 0.5957   |
| T.RTABLE      | VAR                | 0.2608   |
| T.RTABLE.TRAY | VAR                | 0.6208   |
| T.REP.IB.PAIR | VAR                | 4.8506   |

**Table 3: Variance components obtained for repeated measurement analysis of flower count (FC) in TPE I by considering an unstructured variance-covariance structure for serial correlations of observations for T.REP.IB and T.REP.COL; T time effect, T.REP replicate effect, GEN genotype effect, T.GEN genotype time interaction, T.REP.IB row effect, T.REP.COL column effect, T.REP.IB.PAIR residual error**

| Effect        | <i>l</i> , the time-point of observation | Variance parameter | Estimate |
|---------------|------------------------------------------|--------------------|----------|
| T             |                                          |                    | 1.9184   |
| T.REP         |                                          |                    | 0        |
| GEN           |                                          |                    | 2.8560   |
| T.GEN         |                                          |                    | 2.5310   |
| T.REP.IB      | 1                                        | VAR 1              | 0.0010   |
|               | 2                                        | VAR 2              | 0.0002   |
|               |                                          | COV 2 - 1          | 0.0004   |
| T.REP.COL     | 1                                        | VAR 1              | 0.3454   |
|               | 2                                        | VAR 2              | 0.9113   |
|               |                                          | COV 2 - 1          | 0.1885   |
| T.REP.IB.PAIR | 1                                        | VAR 1              | 4.3297   |
|               | 2                                        | VAR 2              | 8.7000   |
|               |                                          | COV 2 - 1          | 1.6435   |

**Table 4: Variance components obtained for repeated measurement analysis of branch count (BC) in TPE I by considering an unstructured variance-covariance structure for serial correlations of observations for T.REP.IB and T.REP.COL; T time effect, T.REP replicate effect, GEN genotype effect, T.GEN genotype time interaction, T.REP.IB row effect, T.REP.COL column effect, T.REP.IB.PAIR residual error**

| <b>Effect</b>        | <b><i>l</i>, the time-point of observation</b> | <b>Variance parameter</b> | <b>Estimate</b> |
|----------------------|------------------------------------------------|---------------------------|-----------------|
| <b>T</b>             |                                                |                           | 0               |
| <b>T.REP</b>         |                                                |                           | 0               |
| <b>GEN</b>           |                                                |                           | 5.6121          |
| <b>T.GEN</b>         |                                                |                           | 0               |
| <b>T.REP.IB</b>      | <b>1</b>                                       | <b>VAR 1</b>              | 0.2565          |
| <b>T.REP.IB</b>      | <b>2</b>                                       | <b>VAR 2</b>              | 1.1762          |
|                      |                                                | <b>COV 2 - 1</b>          | 0.3927          |
| <b>T.REP.COL</b>     | <b>1</b>                                       | <b>VAR 1</b>              | 0.2853          |
|                      | <b>2</b>                                       | <b>VAR 2</b>              | 0.3329          |
|                      |                                                | <b>COV 2 - 1</b>          | 0.1653          |
| <b>T.REP.IB.PAIR</b> | <b>1</b>                                       | <b>VAR 1</b>              | 6.2738          |
|                      | <b>2</b>                                       | <b>VAR 2</b>              | 6.8059          |
|                      |                                                | <b>COV 2 - 1</b>          | 6.2940          |

**Table 5: Variance components obtained for repeated measurement analysis of stem cutting count (SCC) in TPE II by considering an unstructured variance-covariance structure for serial correlations of observations for T.REP.IB and T.REP.COL; T time effect, T.REP replicate effect, GEN genotype effect, T.GEN genotype time interaction, T.REP.IB row effect, T.REP.COL column effect, T.REP.IB.PAIR residual error**

| <b>effect</b>        | <b><i>l</i>, the time-point of observation</b> | <b>Variance parameter</b> | <b>Estimate</b> |
|----------------------|------------------------------------------------|---------------------------|-----------------|
| <b>T</b>             |                                                |                           | 1.1128          |
| <b>T.REP</b>         |                                                |                           | 0.5604          |
| <b>GEN</b>           |                                                |                           | 0.1685          |
| <b>T.GEN</b>         |                                                |                           | 0.0042          |
| <b>T.REP.IB</b>      | <b>1</b>                                       | <b>VAR 1</b>              | 0               |
|                      | <b>2</b>                                       | <b>VAR 2</b>              | 0.0013          |
|                      | <b>3</b>                                       | <b>VAR 3</b>              | 0.0011          |
|                      | <b>4</b>                                       | <b>VAR 4</b>              | 0.0062          |
|                      |                                                | <b>COV 2 - 1</b>          | 0               |
|                      |                                                | <b>COV 3 - 1</b>          | 0               |
|                      |                                                | <b>COV 3 - 2</b>          | 0.0007          |
|                      |                                                | <b>COV 4 - 1</b>          | 0               |
|                      |                                                | <b>COV 4 - 2</b>          | 0.0015          |
|                      |                                                | <b>COV 4 - 3</b>          | 0.0015          |
| <b>T.REP.COL</b>     | <b>1</b>                                       | <b>VAR 1</b>              | 0.0032          |
|                      | <b>2</b>                                       | <b>VAR 2</b>              | 0.0254          |
|                      | <b>3</b>                                       | <b>VAR 3</b>              | 0.0295          |
|                      | <b>4</b>                                       | <b>VAR 4</b>              | 0.0450          |
|                      |                                                | <b>COV 2 - 1</b>          | 0.0023          |
|                      |                                                | <b>COV 3 - 1</b>          | 0.0027          |
|                      |                                                | <b>COV 3 - 2</b>          | -0.0004         |
|                      |                                                | <b>COV 4 - 1</b>          | 0.0032          |
|                      |                                                | <b>COV 4 - 2</b>          | 0.0103          |
|                      |                                                | <b>COV 4 - 3</b>          | 0.0225          |
| <b>T.REP.IB.PAIR</b> | <b>1</b>                                       | <b>VAR 1</b>              | 1.0016          |
|                      | <b>2</b>                                       | <b>VAR 2</b>              | 2.4652          |
|                      | <b>3</b>                                       | <b>VAR 3</b>              | 1.6834          |
|                      | <b>4</b>                                       | <b>VAR 4</b>              | 4.1452          |
|                      |                                                | <b>COV 2 - 1</b>          | -0.1565         |
|                      |                                                | <b>COV 3 - 1</b>          | 0.0763          |
|                      |                                                | <b>COV 3 - 2</b>          | 0.4756          |
|                      |                                                | <b>COV 4 - 1</b>          | 0.1136          |
|                      |                                                | <b>COV 4 - 2</b>          | 1.1030          |
|                      |                                                | <b>COV 4 - 3</b>          | 0.7996          |

**Table 6: Variance components obtained for repeated measurement analysis of rooted stem cutting counts assigned to (*S4 + S5*) of root formation (RF) in TPE II by considering an unstructured variance-covariance structure for serial correlations of observations of observations for T.REP.IB and T.REP.COL; T time effect, T.REP replicate effect, GEN genotype effect, T.GEN genotype time interaction, T.REP.IB row effect, T.REP.COL column effect, RTABLE rooting table effect, RTABLE.TRAY tray effect, T.REP.IB.PAIR residual error**

| Effect               | <i>l</i> , the time-point of observation | Variance parameter | Estimate |
|----------------------|------------------------------------------|--------------------|----------|
| <b>T</b>             |                                          |                    | 0.9205   |
| <b>T.REP</b>         |                                          |                    | 0.3616   |
| <b>GEN</b>           |                                          |                    | 0.3579   |
| <b>T.GEN</b>         |                                          |                    | 0.1303   |
| <b>T.REP.IB</b>      | <b>1</b>                                 | <b>VAR 1</b>       | 0        |
|                      | <b>2</b>                                 | <b>VAR 2</b>       | 0.0030   |
|                      | <b>3</b>                                 | <b>VAR 3</b>       | 0.0023   |
|                      | <b>4</b>                                 | <b>VAR 4</b>       | 0.0267   |
|                      |                                          | <b>COV 2 - 1</b>   | 0        |
|                      |                                          | <b>COV 3 - 1</b>   | 0        |
|                      |                                          | <b>COV 3 - 2</b>   | 0.0025   |
|                      |                                          | <b>COV 4 - 1</b>   | 0        |
|                      |                                          | <b>COV 4 - 2</b>   | 0.0055   |
|                      |                                          | <b>COV 4 - 3</b>   | 0.0045   |
| <b>T.REP.COL</b>     | <b>1</b>                                 | <b>VAR 1</b>       | 0.0006   |
|                      | <b>2</b>                                 | <b>VAR 2</b>       | 0.0958   |
|                      | <b>3</b>                                 | <b>VAR 3</b>       | 0.0172   |
|                      | <b>4</b>                                 | <b>VAR 4</b>       | 0.1224   |
|                      |                                          | <b>COV 2 - 1</b>   | -0.0002  |
|                      |                                          | <b>COV 3 - 1</b>   | 0.0007   |
|                      |                                          | <b>COV 3 - 2</b>   | 0.0201   |
|                      |                                          | <b>COV 4 - 1</b>   | 0.0020   |
|                      |                                          | <b>COV 4 - 2</b>   | 0.0555   |
|                      |                                          | <b>COV 4 - 3</b>   | 0.0213   |
| <b>T.RTABLE</b>      |                                          |                    | 1.4165   |
| <b>T.RTABLE.TRAY</b> |                                          |                    | 0.0896   |
| <b>T.REP.IB.PAIR</b> | <b>1</b>                                 | <b>VAR 1</b>       | 1.5231   |
|                      | <b>2</b>                                 | <b>VAR 2</b>       | 2.4318   |
|                      | <b>3</b>                                 | <b>VAR 3</b>       | 2.9093   |
|                      | <b>4</b>                                 | <b>VAR 4</b>       | 3.6675   |
|                      |                                          | <b>COV 2 - 1</b>   | 0.2605   |
|                      |                                          | <b>COV 3 - 1</b>   | 0.2819   |
|                      |                                          | <b>COV 3 - 2</b>   | 0.7530   |
|                      |                                          | <b>COV 4 - 1</b>   | 0.3815   |
|                      |                                          | <b>COV 4 - 2</b>   | 0.6271   |
|                      |                                          | <b>COV 4 - 3</b>   | 0.8815   |
